# Supplementary material
Source: publisher figshare collection journal article supplement (https://sage.figshare.com/ndownloader/files/11032172)
Supplement: Supplementary file 1 [file 11032172]

**Table 1.** Results of exhaustive genomic profiling, next generation sequencing (NGS) of 65 genes [Ion Torrent technology (Life Technologies, Carlsbad, CA)], methylation profiling and immunohistochemistry (IHC) of the tumor tissue (OncoDEEP<sup>®</sup>) from both patients.

| <b>Patient 1</b>                   |                   |                                                                                                           |
|------------------------------------|-------------------|-----------------------------------------------------------------------------------------------------------|
| <b>NGS</b>                         |                   |                                                                                                           |
| <b>Variants</b>                    | <b>N</b>          |                                                                                                           |
| <b>Probably polymorphism</b>       | 1                 | PIK3CA p.I391M                                                                                            |
| <b>IHC</b>                         |                   |                                                                                                           |
| <b>Protein/Biomarker</b>           | <b>Expression</b> | <b>Clinical Impact</b>                                                                                    |
| <b>P16</b>                         | Positive          | Potential lack of clinical benefits of CDK4/6 inhibitors                                                  |
| <b>CDK4</b>                        | Negative          | Potential lack of clinical benefits of CDK4 inhibitors                                                    |
| <b>phosphoRb</b>                   | Negative          | Potential lack of clinical benefits of CDK4/6 inhibitors                                                  |
| <b>Fusion panel (ALK/ROS1/RET)</b> | Negative          | Potential lack of clinical benefits of Crizotinib                                                         |
| <b>MGMT methylation</b>            | <i>Positive</i>   | <i>Potential clinical benefits of temozolomide</i>                                                        |
| <b>CD8</b>                         | Negative          | Potential lack of clinical benefits of PD-1/PD-L1 inhibitors                                              |
| <b>PD-L1</b>                       | Low               | Potential lack of clinical benefits of PD-1/PD-L1 inhibitors                                              |
| <b>p4EBP1</b>                      | Low               | Potential lack of clinical benefits of mTOR inhibitors                                                    |
| <b>PTEN</b>                        | Positive          | Potential lack of clinical benefits of PIK3CA and/or mTOR inhibitors                                      |
| <b>VEGF</b>                        | Positive          | Treatment based on angiogenesis inhibitors associated with undetermined clinical benefit in paraganglioma |
| <b>VEGFR2</b>                      | Low               | Potential lack of clinical benefits of VEGFR2 inhibitors                                                  |

| <b>Patient 2</b>                                |          |              |
|-------------------------------------------------|----------|--------------|
| <b>NGS</b>                                      |          |              |
| <b>Variants</b>                                 | <b>N</b> |              |
| <b>Variants of Uncertain Significance (VUS)</b> | 1        | KDR p.R961Q  |
| <b>Probably polymorphism</b>                    | 1        | DPYD p.S534N |
| <b>IHC</b>                                      |          |              |

| <b>Protein/Biomarker</b>               | <b>Expression</b>      | <b>Clinical Impact</b>                                               |
|----------------------------------------|------------------------|----------------------------------------------------------------------|
| <b>P16</b>                             | Negative               | Potential clinical benefits of CDK4/6 inhibitors                     |
| <b>CDK4</b>                            | Moderate               | Potential clinical benefits of CDK4 inhibitors                       |
| <b>phosphoRb</b>                       | Positive               | Potential clinical benefits of CDK4/6 inhibitors                     |
| <b>Fusion panel<br/>(ALK/ROS1/RET)</b> | Negative               | Potential lack of clinical benefits of Crizotinib                    |
| <b><i>MGMT methylation</i></b>         | <b><i>Positive</i></b> | <b><i>Potential clinical benefits of temozolomide</i></b>            |
| <b>CD8</b>                             | Negative               | Potential lack of clinical benefits of PD-1/PD-L1 inhibitors         |
| <b>PD-L1</b>                           | Low                    | Potential lack of clinical benefits of PD-1/PD-L1 inhibitors         |
| <b>p4EBP1</b>                          | Low                    | Potential lack of clinical benefits of mTOR inhibitors               |
| <b>PTEN</b>                            | Positive               | Potential lack of clinical benefits of PIK3CA and/or mTOR inhibitors |
| <b>VEGF</b>                            | Negative               | Potential lack of clinical benefits of angiogenesis inhibitors       |
